# Supplementary material for: Crude Heparin Preparations Unveil the Presence of Structurally Diverse Oversulfated Contaminants
Source: MDPI journal article supplement (doi:10.3390/molecules24162988), 2019-08-17
Supplement: s1 [file s1]

## SUPPLEMENTARY MATERIALS

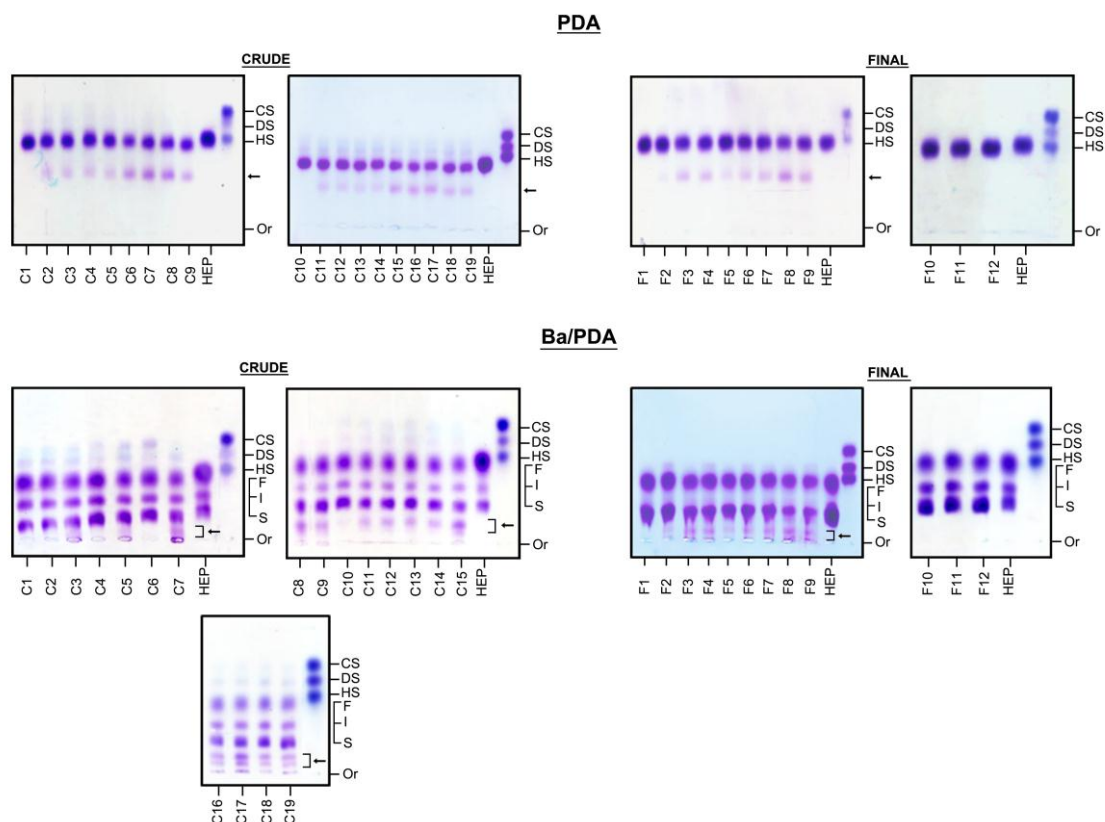

Figure S1: Identification of contaminants in crude and final heparins by agarose gel electrophoresis. Aliquots (5  $\mu$ L, 5-10  $\mu$ g) of heparin samples were applied to 0.55% agarose gel and submitted to electrophoresis in 0.05M PDA or Ba/PDA discontinuous system as described in Methods. The arrow shows the presence of slow migrating bands which are not present in standard heparin. In the discontinuous Ba/PDA buffer this is most evident due to a clear separation of slow migrating bands. The figure also shows differences in the amounts of these contaminants among both the crude and final product heparin.

C1 to C19: crude heparin samples; F1 to F12: final heparin samples; Hep: standard porcine heparin; CS/DS/HS: standard mixture of chondroitin sulfate (CS), dermatan sulfate (DS), and heparan sulfate (HS); S: heparin slow moving component, I: heparin intermediate moving component; F: heparin fast moving component.

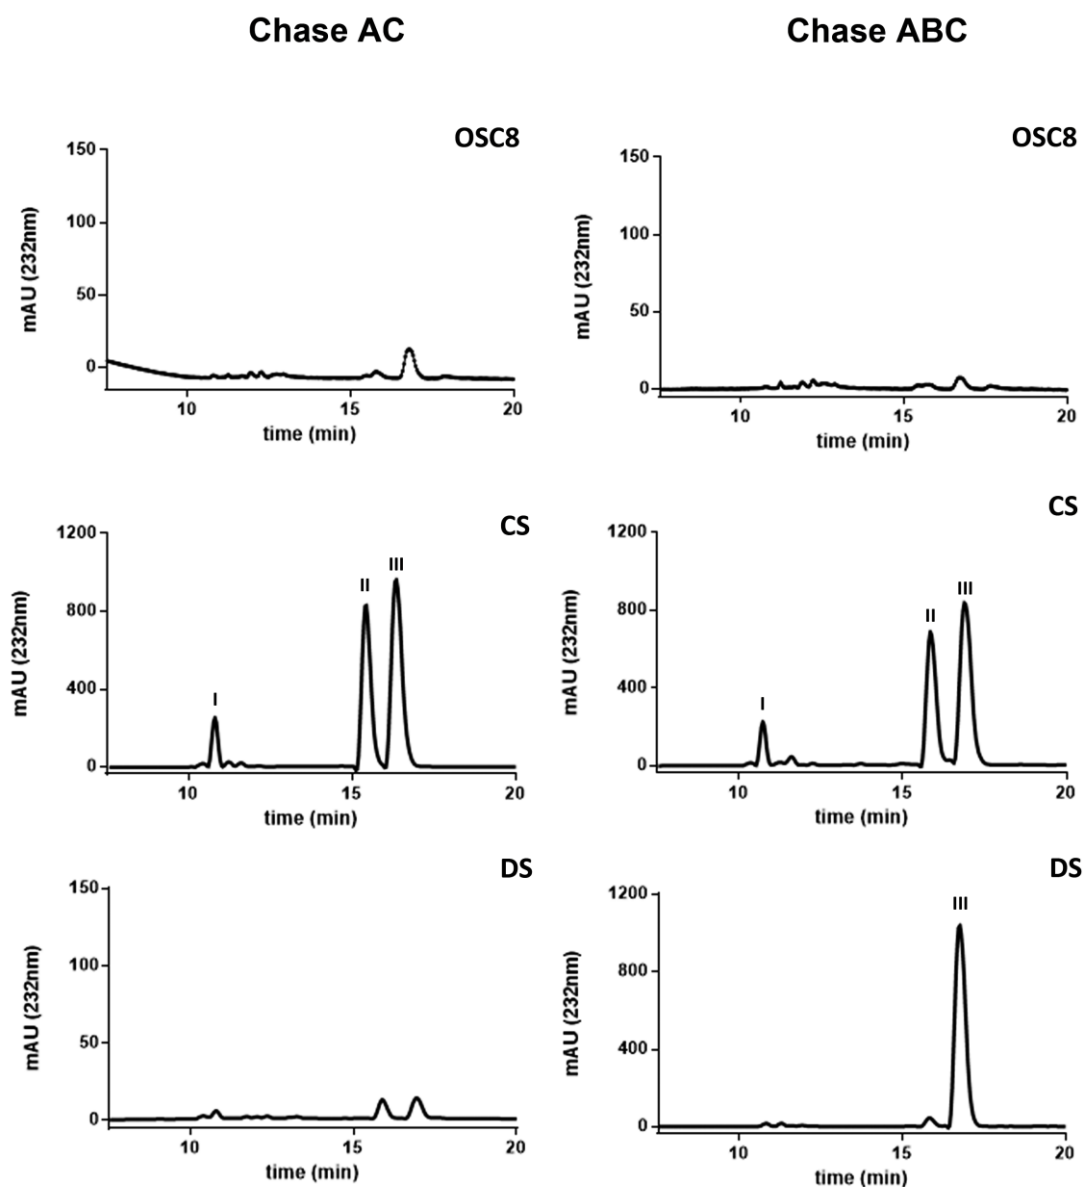

Figure S2: Analysis of the products formed after exhaustive degradation with chondroitinase AC and ABC by SAX-HPLC ion exchange chromatography. Samples of the isolated contaminant (OSCS) (100  $\mu$ g) were incubated with 30 mU of the chondroitinase AC (from *Arthrobacter aurescens*) and ABC (from *Proteus vulgaris*) in 50mM sodium acetate buffer pH 8.0. The products were resolved in Zorbax SAX column with 0-1.5 M NaCl gradient with a flow of 1 mL/min for 30 min and the unsaturated products monitored by absorbance at 232 nm. Under conditions of exhaustive degradation (72h and 0.3 enzyme units) no product formation was observed, even though the polysaccharide is non-sulfated at position C-3 of the glucuronic. On the other hand, the enzymes act upon chondroitin sulfate (CS) and dermatan sulfate (DS) yielding the expected products. Chase AC: chondroitinase AC; Chase ABC: chondroitinase ABC; CS: Chondroitin sulfate; DS: dermatan sulfate; OSC8: sulfated contaminant isolated from crude heparin C8; Peak I:  $\Delta$ DiOS (non-sulfated unsaturated disaccharide);

Peak II:  $\Delta$ Di6S (6-sulfated unsaturated disaccharide); Peak III:  $\Delta$ Di4S (4-sulfated unsaturated disaccharide).

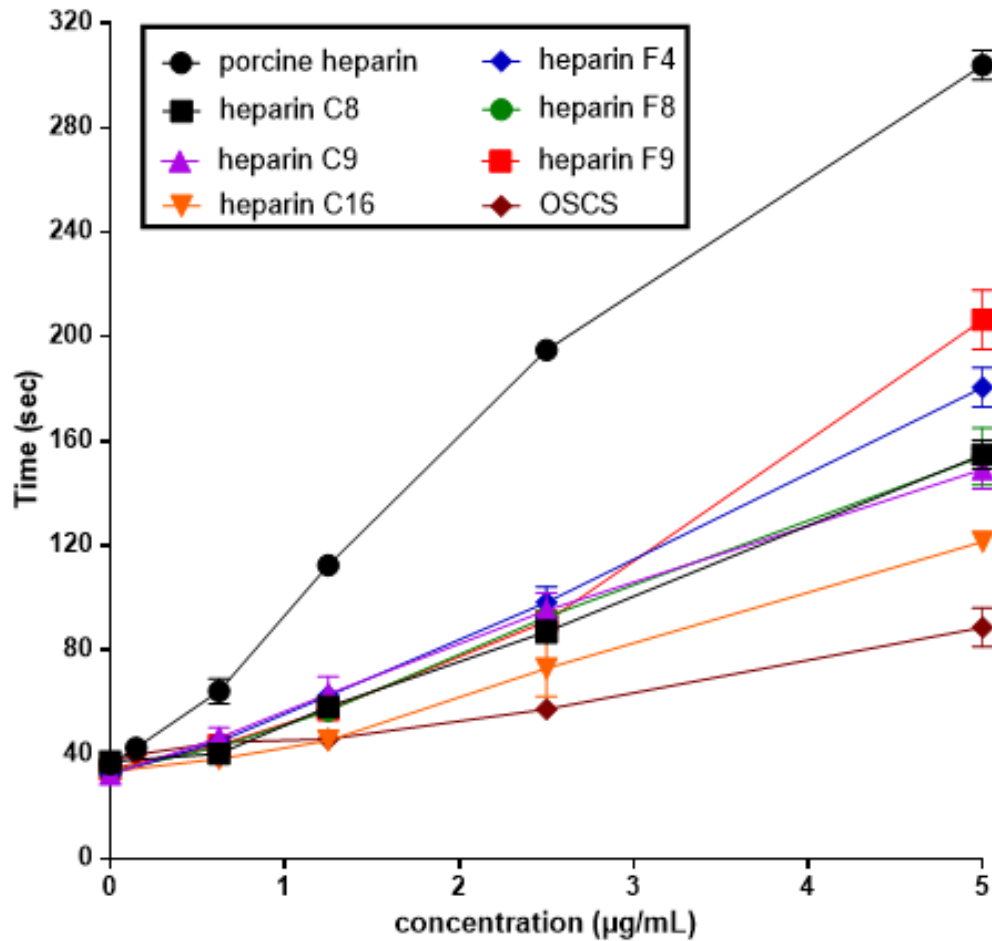

Figure S3. Comparative *in vitro* anticoagulant profile of heparin and crude and final product heparin samples in the APTT assay. From 0.625  $\mu\text{g/mL}$  to up 5.0  $\mu\text{g/mL}$  concentration, the contaminated heparins showed a significant decrease in the APTT compared to the standard heparin. The data represent the mean  $\pm$  SEM of triplicates.

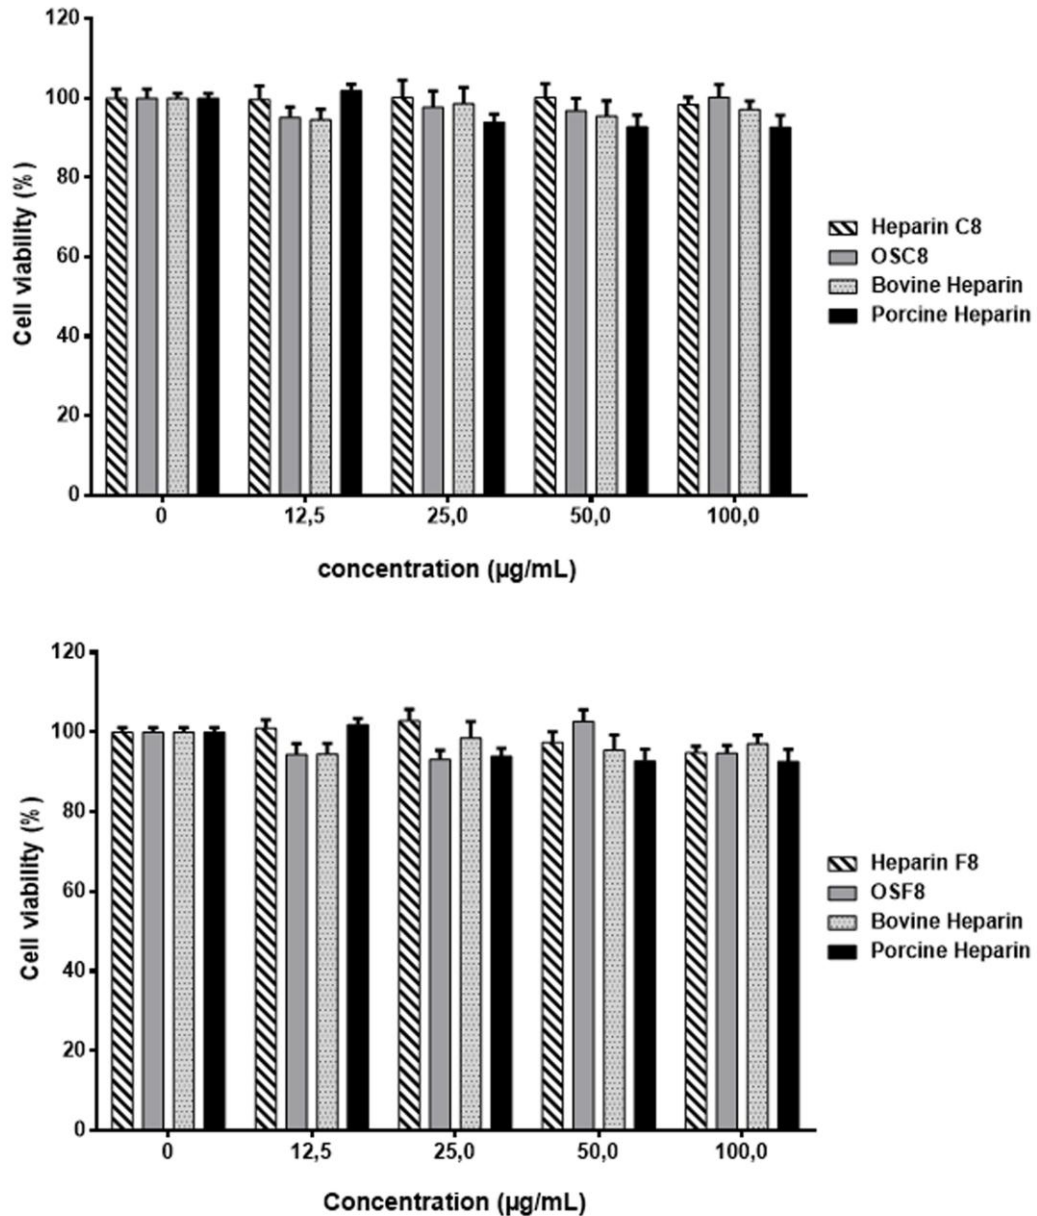

Figure S4: Effect of sulfated contaminants on the viability of endothelial cells. EC were plated in 96-well microplates ( $1 \times 10^4$  cells per well in enriched F12) and maintained for 24 h in an incubator at 37 °C in 2.5% CO<sub>2</sub> atmosphere. The cells were then exposed to different concentrations of the batches of heparins or isolated contaminants in 150 µL of enriched F12 for 24 h at 37 °C in 2.5% CO<sub>2</sub> atmosphere. Afterwards the medium was aspirated and 200 µL/well Alamar Blue® (0.1 mg/mL) solution prepared in serum-free culture medium added. The cells were then incubated for 4 h at 37 °C in an atmosphere of 2.5% CO<sub>2</sub>. Next, 100µL of the medium were transferred to 96-well microplates and the reduction of the rezasurin salt in resorufin was measured by fluorescence analysis ( $\lambda_{Exc} = 560\text{nm}$ ;  $\lambda_{Em} = 590\text{nm}$ ) in FlexStation<sup>3</sup> PlateReader, Molecular Devices. The results show no effect of the compounds in all tested concentrations. Heparin C8: crude

heparin C8; OSC8: sulfated contaminant purified from crude heparin C8; OSF8: sulfated contaminant purified from final heparin F8.

Table S1. Samples of crude and final product heparins used in this study (supplementary materials)

| Crude heparin samples |            | Final heparin samples |              |
|-----------------------|------------|-----------------------|--------------|
| Sample                | Batch      | Sample                | Batch        |
| C1                    | CSP-609086 | F1                    | 1060-07-0002 |
| C2                    | CSP-609087 | F2                    | 1060-07-0022 |
| C3                    | CSP-709019 | F3                    | 1060-07-0023 |
| C4                    | CSP-709020 | F4                    | 1060-07-0025 |
| C5                    | CSP-709021 | F5                    | 1060-07-0026 |
| C6                    | CSP-709024 | F6                    | 1060-07-0027 |
| C7                    | CSP-709025 | F7                    | 1060-07-0028 |
| C8                    | CSP-709026 | F8                    | 1060-07-0029 |
| C9                    | CSP-709027 | F9                    | 1060-07-0030 |
| C10                   | CSP-709028 | F10                   | 1060-05-0002 |
| C11                   | CSP-709029 | F11                   | 1060-05-0023 |
| C12                   | CSP-709030 | F12                   | 1060-05-0027 |
| C13                   | CSP-709031 |                       |              |
| C14                   | CSP-709032 |                       |              |
| C15                   | CSP-709033 |                       |              |
| C16                   | CSP-709034 |                       |              |
| C17                   | CSP-709035 |                       |              |
| C18                   | CSP-709036 |                       |              |
| C19                   | CSP-709037 |                       |              |

Table S2. Percentage of contaminants in crude and final product heparins  
(supplementary materials)

| Crude heparin samples | Heparin (%) | Contaminant (%) | Final heparin samples | Heparin (%) | Contaminant (%) |
|-----------------------|-------------|-----------------|-----------------------|-------------|-----------------|
| C1                    | 100         | -               | F1                    | 100         | -               |
| C2                    | 92.2        | 7.8             | F2                    | 96.3        | 3.7             |
| C3                    | 92.4        | 7.6             | F3                    | 86.5        | 13.5            |
| C4                    | 90.2        | 9.8             | F4                    | 88.9        | 11.1            |
| C5                    | 91.1        | 8.9             | F5                    | 95.7        | 4.3             |
| C6                    | 76.2        | 23.8            | F6                    | 91.4        | 8.6             |
| C7                    | 73.7        | 26.3            | F7                    | 88.4        | 11.6            |
| C8                    | 71.9        | 28.1            | F8                    | 74.8        | 25.2            |
| C9                    | 82.0        | 18.0            | F9                    | 81.0        | 18.1            |
| C10                   | 100         | -               | F10                   | 100         | -               |
| C11                   | 87.3        | 12.7            | F11                   | 100         | -               |
| C12                   | 87.1        | 12.9            | F12                   | 100         | -               |
| C13                   | 89.5        | 10.5            | Standard              | 100         | -               |
| C14                   | 89.7        | 10.3            |                       |             |                 |
| C15                   | 78.7        | 21.3            |                       |             |                 |
| C16                   | 75.5        | 24.5            |                       |             |                 |
| C17                   | 73.2        | 26.8            |                       |             |                 |
| C18                   | 81.2        | 18.8            |                       |             |                 |
| C19                   | 80.5        | 19.5            |                       |             |                 |
